# Supplementary material for: Microcystic Inner Nuclear Layer Changes and Retinal Nerve Fiber Layer Defects in Eyes with Glaucoma
Source: PLoS One. 2015 Jun 12;10(6):e0130175. doi: 10.1371/journal.pone.0130175 (PMC4467090; doi:10.1371/journal.pone.0130175)
Supplement: S1 File — Detail data of POAG group and normal group, and the subjects with microcystic inner nuclear layer lesions. (XLSX) [file pone.0130175.s001.xlsx]

## Sheet: POAG, included
date of Spectralis exam	sex M/F	side R/L	age	BCVA	Spherical	Cylinder	spherical equivalent	lens	INL cystic change	IR hypo	stage	axial length	MD	MD slope	IOP average	IOP SD	IOP 1	IOP 2	IOP 3	IOP 4	IOP 5	HFA duration(M)	HFA number of exams
2013-04-01	M	R	54	1.5	0	-0.75	-0.375	IOL	-	-	PPG	23.67	-0.62	0.22	14.4	1.14018	16	15	14	14	13	43	9
2013-04-01	M	L	54	1.5	-0.25	-1.25	-0.875	IOL	-	t.u.+	PPG	24.05	-1.53	-0.18	16	0.707107	16	17	16	16	15	43	9
2013-04-01	F	L	54	1.5	-8.5	-1	-9	lens	-	t.l +	ADVANCED	26.51	-11.13	-0.68	13.2	1.30384	12	14	15	13	12	74	20
2013-04-01	F	R	54	1.5	-8.5	-0.5	-8.75	lens	-	-	PPG	26.46	0.22	-0.12	14	1.58114	12	14	15	16	13	74	20
2013-04-01	F	R	39	1.5	-7.75	-0.25	-7.875	lens	-	-	PPG	27.34	0.68	0.63	16.6	1.14018	15	17	17	16	18	44	8
2013-04-01	F	L	39	1.5	-7.75	-0.5	-8	lens	-	-	PPG	27.29	-0.39	0.54	16.2	1.48324	14	16	17	16	18	44	8
2013-04-01	M	R	47	0.7	-7.25	-9.25	-11.875	lens	-		ADVANCED	26.93	-14.37	-0.3	14.2	2.77489	17	14	12	11	17	72	7
2013-04-01	M	L	47	1.2	-5.5	-3.25	-7.125	lens	-		ADVANCED	26.44	-10.37	-0.35	14	2.54951	17	14	12	11	16	72	7
2013-04-08	F	L	51	1.2	-8.75	-0.75	-9.125	lens	+	lower,+	ADVANCED	26.21	-12.67	-1.45	16.2	2.38747	13	15	16	19	18	66	21
2013-04-08	F	R	51	1.2	-9.25	-1	-9.75	lens	-	-	moderate	26.43	-5.06	-0.36	16	2	14	14	16	18	18	66	21
2013-04-08	F	R	49	1.5	-7.25	-0.75	-7.625	lens	-	t.,u.＋	ADVANCED	25.59	-7.53	-0.46	14.4	1.14018	13	14	14	16	15	36	4
2013-04-08	F	L	49	1.5	-7	-0.75	-7.375	lens	-	n.,u.+	early	25.62	-1.8	-0.64	13.8	0.83666	13	13	14	15	14	36	4
2013-04-08	F	R	54	1.5	-4	-0.25	-4.125	lens	-	-	early	24.45	-1.33	0.72	17.4	0.547723	18	17	17	18	17
2013-04-08	F	L	54	1.5	-3.75	-0.5	-4	lens	-	-	PPG	24.35	-0.06	1.46	16.6	1.14018	17	15	18	17	16	27	4
2013-04-08	M	R	54	1.5	-7.5	-1.25	-8.125	lens	-	-	ADVANCED	26.57	-10.82	-0.09	12.4	1.51658	12	11	12	15	12	39	20
2013-04-08	M	L	54	1.5	-11.5	-1	-12	lens	-	upper,t.l.+	ADVANCED	27.77	-26.64	0.02	11	2	12	9	10	14	10	39	20
2013-04-08	M	R	56	1.5	-8	-0.5	-8.25	lens	-	nasal+	ADVANCED	26.82	-15.81	-0.39	14.8	1.09545	14	16	16	14	14	67	8
2013-04-08	M	L	56	1.5	-6.75	-1.25	-7.375	lens	-	nasal+	ADVANCED	26.71	-23.69	-0.47	11.8	0.83666	11	13	12	11	12	67	8
2013-04-08	F	R	49	1.2	-11	-1	-11.5	lens	-	-	early	28.66	-3.82	0.11	13.4	1.34164	12	14	12	15	14	62	11
2013-04-08	M	R	68	1.2	-0.5	-1	-1	lens	-	-	PPG		-0.88	-0.17	24.2	3.63318	28	23	20	22	28	67	7
2013-04-08	M	L	68	1.5p	0.75	-1.25	0.125	lens	-	-	PPG		-1.47	-0.2	24	2.54951	25	23	22	22	28	67	7
2013-04-08	M	L	68	1.2	-1.75	-1.5	-2.5	lens	-	-	EARLY	25.5	-2.95	0.13	11.4	1.34164	12	13	10	10	12	56	6
2013-04-08	M	R	68	1.2	-3	-1	-3.5	lens	-	-	PPG	25.65	-1.27	-0.07	11.6	1.14018	12	13	10	11	12	56	7
2013-04-08	M	R	65	1.2	2	-1	1.5	lens	-	-	MODERATE	22.51	-6.65	-0.16	14.8	1.64317	17	16	14	14	13	73	5
2013-04-08	M	R	42	1.5	-7.25	-0.5	-7.5	lens	-	-	Early	27.15	-2.17	-0.04	16	2.73861	20	17	13	16	14	55	18
2013-04-08	M	L	42	1.2	-7	-0.5	-7.25	lens	-	-	PPG	26.74	-0.97	0.18	17.2	3.27109	22	17	13	18	16	55	18
2013-04-08	F	R	65	1.5	0.5	-0.5	0.25	lens	-	-	Early	23.58	-3.25	-0.09	16.2	1.48324	16	17	18	16	14	74	23
2013-04-08	F	L	65	1.5	1	-0.5	0.75	lens	-	-	MODERATE	23.69	-4.96	0.09	16.4	1.67332	16	18	18	16	14	74	22
2013-04-15	F	L	64	1.5	-5	-1	-5.5	lens	-	-	early	25.07	-0.78	0.39	16.2	1.78885	16	14	18	15	18	46	15
2013-04-15	F	R	64	1.2	-5.75	-0.25	-5.875	lens	-	-	moderate	24.78	-1.62	0.26	16.2	1.78885	16	14	18	15	18	36	14
2013-04-15	M	R	68	1.2	-5.25	-1.5	-6	lens	-	-	early	26.16	-1.94	0.05	15.6	1.51658	16	14	14	17	17
2013-04-15	M	L	68	1.5	-4.25	-1.75	-5.125	lens	-	-	early	25.51	-3.13	0.12	15.2	0.83666	14	15	15	16	16
2013-04-15	F	L	51	1.2	-8.75	-0.5	-9	lens	-	-	ADVANCED	26.49	-9.31	-0.92	13.4	1.14018	13	14	15	12	13	69	22
2013-04-15	F	R	51	1.2	-9.25	-1	-9.75	lens	-	-	early	26.89	-0.41	-0.02	15	2.34521	13	18	17	13	14	69	23
2013-04-15	F	R	72	1.0p	-2.25	-2	-3.25	lens	-	-	ADVANCED	24.25	-23.82	-1.18	11.6	0.894427	11	11	12	13	11	52	7
2013-04-15	F	L	72	1.2	-2.25	-1.75	-3.125	lens	-	-	ADVANCED	23.65	-14.16	-0.64	11.2	0.83666	11	10	12	12	11	52	7
2013-04-15	F	R	54	1.5	1.5	-0.25	1.375	lens	-	-	ADVANCED	22.16	-7.39		12	1.41421	14	11	12	11
2013-04-15	F	L	54	1.2p	1.75	-0.5	1.5	lens	-	-	ADVANCED	22.08	-7.55		11.75	1.5	14	11	11	11
2013-04-15	F	R	58	1.5	-3.75	-1	-4.25	lens	-	-	moderate		-8.8	-0.85	13.6	1.81659	12	15	16	12	13	66	8
2013-04-15	M	R	67	1.2	-4.75	-1.25	-5.375	lens	-	-	early		-1.61	0.37	17.8	1.09545	18	19	18	16	18
2013-04-15	M	L	67	1.2	-3.75	-0.75	-4.125	lens	-	-	early		-2.68	0.82	16.6	1.94936	16	19	16	14	18
2013-04-15	M	L	64	1.2	-5	-1	-5.5	lens	-	-	moderate		-4.26	-0.34	15.4	1.14018	15	16	17	15	14	55	5
2013-04-22	F	R	53	0.9	-7.5	-0.75	-7.875	lens	-	temporal	ADVANCED	26.58	-9.05	-0.16	13	3.24037	13	14	17	13	8	66	17
2013-04-22	M	R	34	1.5	-11.5	-1	-12	lens	-	-	ADVANCED	28.27	-20.87	0.11	17	0.707107	17	17	17	18	16	30	4
2013-04-22	F	L	53	0.7p	-11	-2	-12	lens	-	-	ADVANCED	26.84	-14.89		13	1	12	13	12	14	14
2013-04-22	M	L	77	1.2	0	-1.5	-0.75	lens	-	-	moderate	23.39	-3.82	-0.31	19.8	2.16795	21	17	21	22	18	37	5
2013-04-22	M	R	77	1.5	0.5	-1	0	lens	-	-	PPG	23.48	-1.78	0.01	18.2	1.92354	18	17	19	21	16	37	5
2013-04-22	F	R	51	1.5	-9.5	-0.5	-9.75	lens	-	-	moderate	26.58	-5.4	-0.35	15.2	1.30384	15	17	14	14	16	32	4
2013-04-22	F	L	51	1.2	-9	-0.75	-9.375	lens	-	-	moderate	26.78	-3.28	-0.24	17	1	16	18	16	17	18	32	5
2013-04-22	M	R	60	1.5	-6.25	-0.75	-6.625	lens	+	lower	ADVANCED	25.63	-6.71		16.2	1.92354	15	14	17	19	16	24	4
2013-04-22	M	L	60	1.5	-6.25	-0.75	-6.625	lens	-	-	early	25.63	-0.63		16	1.58114	15	14	17	18	16	24	4
2013-04-22	F	R	63	1.5	1.25	-1.25	0.625	lens	-	-	ADVANCED	21.92	-0.76	-0.54	14.8	2.38747	14	14	14	19	13	43	16
2013-04-22	F	L	63	1.5p	0.75	-1.5	0	lens	-	-	ADVANCED	21.87	-6.21	-0.04	16.2	2.38747	16	15	18	19	13	45	18
2013-04-22	F	R	67	1.2	3	-1.5	2.25	lens	-	-	ADVANCED	23.03	-0.93	0.3	12.6	1.14018	13	11	14	13	12	51	6
2013-04-22	F	L	52	1.5	-0.5	-0.5	-0.75	lens	-	-	ADVANCED	22.88	-0.26	-0.26	16.8	1.78885	15	15	18	19	17	78	16
2013-04-22	F	R	52	1.5	0	-0.25	-0.125	lens	-	-	early	22.92	-0.18	-0.11	16.6	0.894427	16	16	17	18	16	78	18
2013-04-22	F	L	51	1.5	-4.75	-0.5	-5	lens	-	-	moderate	25.74	-5.88	-0.67	15	1.87083	13	16	16	13	17	62	19
2013-04-22	F	R	51	1.5	-4	-0.5	-4.25	lens	+	temporal lower	moderate	25.21	-5.68	-0.79	14.2	1.64317	13	13	16	13	16	62	18
2013-04-22	F	L	37	0.7	-10	-0.25	-10.125	lens	-	-	ADVANCED	28.48	-21.36	-1.16	12.8	0.83666	13	14	12	13	12
2013-04-22	F	R	37	1	-9	-0.25	-9.125	lens	-	-	early	27.88	-3.49	1.02	13	0.707107	13	14	13	13	12
2013-05-13	F	R	62	1.2	-4.75	-0.25	-4.875	lens	-	-	early	24.55	-2.12	0.24	16.4	1.67332	18	16	16	18	14	75	7
2013-05-13	F	L	62	1	-5.75	-0.75	-6.125	lens	-	-	moderate	25.04	-6.5	0.06	16.2	1.30384	18	16	15	15	17	75	7
2013-05-13	M	L	52	1.5	-6.75	-1	-7.25	lens	-	lower,	early	26.85	-1.35	0.9	15.4	0.894427	14	16	16	15	16
2013-05-13	M	R	52	1.5	-9.5	-0.5	-9.75	lens	-	nasal	moderate	27.91	-6.41	-1.34	15.2	0.83666	14	16	15	15	16
2013-05-13	F	L	78	1.5	3.75	-2	2.75	lens	-	temporal	early	22.28	-1.05	-0.62	15.2	2.28035	16	18	12	14	16	42	5
2013-05-13	F	R	78	1.5	1.25	-1.25	0.625	lens	-	-	moderate	22.78	-4.29	-0.37	14.2	1.92354	13	17	12	14	15	42	5
2013-05-13	F	R	39	1.5	-5.75	-0.75	-6.125	lens	-	lower	early	25.96	-1.31	-0.18	14.2	0.83666	15	13	15	14	14	49	10
2013-05-13	F	L	39	1.2	-5.5	-0.75	-5.875	lens	-	-	moderate	25.78	-3.94	0.39	13.2	1.78885	15	12	15	11	13	49	10
2013-05-13	F	L	63	1.2	-5.75	-0.5	-6	lens	+	lower,nasal,upper	ADVANCED	26.4	-15.33	-0.46	13.6	3.20936	11	12	12	14	19	67	20
2013-05-13	F	R	63	1.2	-5	-0.75	-5.375	lens	-	upper,lower,nasal	early	26.61	-0.98	-0.08	14.2	1.09545	13	14	14	14	16	67	19
2013-05-13	M	R	43	1.2	-7	-1.25	-7.625	lens	-	-	ADVANCED	25.67	-13.14	0.63	16.8	2.04939	15	15	17	17	20	39	5
2013-05-13	M	L	43	1.2	-7.25	-1.25	-7.875	lens	-	-	ADVANCED	25.79	-22.23	-0.01	17	2.23607	14	16	18	17	20	32	4
2013-05-13	M	L	66	1.2	-5.25	-0.75	-5.625	lens	-	nasal lower	ADVANCED	26.29	-12.02	-0.26	14.4	2.79285	12	11	17	15	17	61	16
2013-05-13	M	R	66	1.2	-5.5	1.25	-4.875	lens	-	upper,lower,nasal	PPG	26.48	-0.46	0.02	17.4	1.67332	16	16	18	17	20	60	17
2013-05-13	M	R	55	1.2	-9	-0.75	-9.375	lens	-	-	ADVANCED	28	-11.42	-0.74	14.2	3.27109	15	13	19	14	10	62	8
2013-05-13	M	L	55	0.9	-10.75	-0.5	-11	lens	-	nasal,lower	ADVANCED	28.37	-22.54	-0.71	15.4	3.36155	14	15	21	15	12	62	10
2013-05-13	M	R	75	1.5	-0.5	-0.75	-0.875	lens	-	-	PPG	23.07	-1.16	0.19	15.2	1.30384	17	15	16	14	14	66	19
2013-05-13	M	L	75	1.5	0	-1	-0.5	lens	-	-	PPG	23.03	0.3	0.06	13.6	2.70185	17	15	14	12	10	66	20
2013-05-20	M	R	64	1.5	0.25	-2.25	-0.875	lens	-	-	moderate	24.97	-8.44	0.09	15.2	2.16795	13	17	14	18	14	45	18
2013-05-20	M	L	64	1.5	-1	-0.75	-1.375	lens	-	-	moderate	24.9	-9.43	0.8	15.2	2.68328	13	17	14	19	13	45	18
2013-05-20	F	L	62	1.2	2.75	-2	1.75	lens	-	-	ADVANCED	23.06	-3.76	-0.26	14.2	0.83666	15	15	14	14	13	67	9
2013-05-20	F	R	64	1.5	-0.75	-0.75	-1.125	lens	-	-	early	23.73	-2.93	0.09	15	1.22474	15	15	17	14	14
2013-05-20	F	L	64	1	-0.75	-1.25	-1.375	lens	-	-	moderate	23.6	-8.57	-0.28	15.2	1.30384	16	15	17	14	14
2013-05-20	F	R	49	1.5p	-10.5	-1.5	-11.25	lens	-	T.u.	early	27.49	-2.48	0.06	17.8	1.09545	16	19	18	18	18	46	13
2013-05-20	F	L	49	1.5	-10.75	-1.25	-11.375	lens	-	T.u.	early	27.86	-1.02	-0.14	17.4	0.894427	16	17	18	18	18	46	13
2013-05-27	F	R	53	1.2p	-1	-1.25	-1.625	lens	-	-	ADVANCED	25.31	-14.13	0.31	11	2.23607	14	10	8	11	12	48	7
2013-05-27	F	L	53	1	-0.75	-1.25	-1.375	lens	-	-	early	25.2	-2.16	0.53	12.2	2.28035	15	10	10	14	12	48	7
2013-05-27	M	R	50	1.5	-8	-0.5	-8.25	lens	-	-	moderate	27.01	-4.26	-0.89	12.6	1.14018	14	13	12	11	13	51	18
2013-05-27	M	L	50	1.5	-6.75	-1	-7.25	lens	-	-	moderate	26.58	-6.52	0.8	12.8	1.09545	13	13	13	14	11	51	19
2013-05-27	F	R	65	1	-4.25	-2	-5.25	lens	-	-	early		-1.58		14.4	0.547723	15	15	14	14	14
2013-05-27	F	L	65	1	-4	-2.5	-5.25	lens	-	-	PPG		-0.2		14.6	0.894427	15	16	14	14	14
2013-05-27	F	R	67	1.5	-1.25	-0.75	-1.625	lens	-	-	PPG	23.32	-1.65	-0.4	20.8	0.83666	22	20	21	21	20
2013-05-27	F	L	67	1.5	-0.75	-1.25	-1.375	lens	-	-	PPG	23	-3.51	-1.54	22	1	23	22	23	21	21
2013-05-27	M	L	64	1.5	-0.5	-0.5	-0.75	lens	-	-	ADVANCED	24.6	-15.77	-0.42	15.4	1.51658	13	16	16	15	17	74	6
2013-05-27	M	R	64	1.5	0.75	-1	0.25	lens	-	-	PPG	24.21	1.28	0.5	18.2	0.447214	18	18	18	18	19	74	6
2013-05-27	F	L	66	1.0p	1.75	-0.5	1.5	lens	+	lower	ADVANCED	22.51	-3.46	-1.32	14	2.64575	13	11	15	18	13	39	4
2013-05-27	F	R	66	1.2	2	-0.5	1.75	lens	-	-	early	22.48	-0.19	-0.57	13	0.707107	13	12	14	13	13	39	4
2013-05-27	M	L	65	1	-6.75	-2.75	-8.125	lens	-	-	ADVANCED	25.64	-6.81	1.06	12.2	1.30384	14	12	11	11	13	53	6
2013-05-27	F	L	67	0.9	-1.5	-0.5	-1.75	lens	-	-	early		-1.24	-0.29	14.8	3.70135	17	12	10	19	16	47	6
2013-05-27	F	R	67	0.9	-2.25	-1.25	-2.875	lens	-	-	moderate		-7.09	-0.67	15.2	4.08656	12	14	11	19	20	47	8
2013-05-27	M	R	70	1.2	-3	-2	-4	lens	-	-	ADVANCED	25.46	-28.11	-0.23	12.8	0.83666	13	13	14	12	12	71	7
2013-05-27	M	L	70	1.5p	-3.75	-1.5	-4.5	lens	-	-	ADVANCED	25.46	-16.81	0.11	13.4	1.14018	15	13	14	12	13	71	7
2013-05-27	F	R	79	1	0.5	-1	0	lens	+	-	ADVANCED	22.8	-9.22	0.15	13.6	2.60768	17	15	11	11	14	67	5
2013-05-27	F	L	79	1.2	2.5	-1.25	1.875	lens	-	-	ADVANCED	22.93	-5.96	-0.48	13.6	2.40832	17	15	12	11	13	67	5
2013-05-27	M	L	58	1.5	-7	-0.25	-7.125	lens	-	-	moderate	26.73	-4.42	-0.72	16.8	1.30384	18	17	16	15	18	72	8
2013-05-27	M	R	58	1.5	-6.25	-0.75	-6.625	lens	-	-	PPG	26.78	0.36	-0.12	17.6	0.547723	18	18	17	17	18	72	9
2013-05-27	F	R	75	1.5	-1	-2	-2	lens	-	nasal lower	ADVANCED	23.98	-22.21	-0.49	9.4	0.547723	9	10	10	9	9	44	15
2013-05-27	F	L	75	1.2	-2.75	-1	-3.25	lens	-	-	ADVANCED	24.47	-26.44	-0.36	10.4	0.547723	11	10	10	10	11	44	15
2013-05-27	M	R	58	1.5	-3.25	-0.75	-3.625	lens	-	-	early	25.8	-0.6	-0.12	13.8	1.48324	12	16	13	14	14	40	11
2013-05-27	M	L	58	1.5	-3.25	-0.75	-3.625	lens	-	-	early	26.02	-0.26	-0.26	13.8	2.38747	12	17	11	15	14	40	11
2013-05-27	F	L	53	1.2	-4.5	-1	-5	lens	-	-	ADVANCED	24.5	-15.94	-1.98	16.4	1.67332	14	18	16	18	16	37	11
2013-05-27	F	R	53	1.2	-4.25	-0.5	-4.5	lens	-	-	early	24.37	-1.74	-0.07	17.2	0.83666	16	17	17	18	18	37	12
2013-05-27	F	R	43	1.5	-2.75	-0.5	-3	lens	-	-	early	24.92	-2.12	-0.27	12.4	2.07364	11	12	10	15	14	34	11
2013-05-27	F	L	43	1.5	-3	-0.75	-3.375	lens	-	-	early	25.11	-2.47	-0.3	12.8	2.04939	11	12	11	15	15	37	12
2013-05-27	F	R	76	1	0	-1	-0.5	lens	-	-	moderate		-5.27	-0.05	14.6	0.894427	15	15	15	15	13	68	5
2013-05-27	F	L	76	0.8	-1.5	-1.5	-2.25	lens	-	-	moderate		-6.9	-0.2	14.8	1.09545	15	16	15	15	13	75	6
2013-06-03	M	R	52	1.5	-1.25	-2	-2.25	lens	-	-	early	25.05	-3.9	-0.3	14.2	2.04939	12	15	16	12	16	49	18
2013-06-03	F	L	67	0.9	-3.5	-0.5	-3.75	lens	-	-	ADVANCED	25.3	-15.04	0.24	13	1.22474	13	12	15	12	13	53	6
2013-06-03	F	R	67	1.5	-3.25	-0.75	-3.625	lens	-	-	early	25.38	-0.39	0.26	13.8	2.16795	13	12	15	12	17	53	5
2013-06-03	F	R	55	1.5	-3.75	-0.75	-4.125	lens	-	-	PPG	25.45	-0.97	0.03	16.8	2.04939	15	15	19	19	16	71	20
2013-06-03	F	L	55	1.5	-4.25	-0.75	-4.625	lens	-	-	PPG	25.73	-0.07	0.14	17.4	1.51658	15	19	18	18	17	71	16
2013-06-03	F	L	54	1.5	-9.75	-1.25	-10.375	lens	-	lower	ADVANCED	27.45	-6.66	-0.04	17.8	1.30384	17	18	19	19	16	52	21
2013-06-03	F	R	54	1.5	-9.25	-0.75	-9.625	lens	-	-	early	27.57	-3.29	0	17	1.87083	14	17	17	18	19	52	21
2013-06-03	M	L	46	1.2	-8.75	-1.25	-9.375	lens	-	-	early	27	-3.14	0.28	12.2	1.09545	11	12	14	12	12	55	17
2013-06-03	M	R	46	1.2	-8.75	-0.5	-9	lens	-	-	moderate	26.86	-6.18	0.19	12.4	0.894427	12	12	14	12	12	55	17
2013-06-03	F	R	39	1.5	-0.5	-0.25	-0.625	lens	-	-	moderate	23.65	-8.41	-0.07	13.8	0.83666	13	14	14	13	15	24	12
2013-06-03	F	L	39	1.5	0.5	-0.25	0.375	lens	-	-	moderate	23.25	-10.25	-0.36	14.8	1.09545	14	14	16	14	16	24	12
2013-06-03	F	R	56	1.2	-5.75	-1.25	-6.375	lens	-	-	ADVANCED	25.13	-14.45		20.4	1.81659	23	18	20	21	20
2013-06-03	F	L	56	1.2	-5.5	-1.25	-6.125	lens	-	-	moderate	25.21	-3.92	0.47	18.6	1.14018	19	20	18	17	19	36	4
2013-06-03	M	R	71	1.5p	-1.25	-1.25	-1.875	lens	-	-	moderate	25.43	-4.95	-0.2	13.4	0.894427	13	14	14	14	12	65	24
2013-06-03	M	L	71	1.5p	-0.5	-1.25	-1.125	lens	-	-	moderate	24.88	-1.84	-0.36	12	1.22474	11	12	14	12	11	65	25
2013-06-03	M	R	52	1.5	-1.25	-2.25	-2.375	lens	-	-	PPG	23.83	-2.39	-0.16	19.8	1.64317	17	20	21	21	20	46	6
2013-06-10	F	L	44	1.5	-0.25	-0.25	-0.375	lens	+	lower	moderate	23.41	-2.93	-0.38	14.8	1.64317	14	14	13	17	16	60	20
2013-06-10	M	R	70	1.2	-8.75	-0.5	-9	lens	-	-	moderate	28.2	-7.68	-0.2	13.6	1.51658	13	12	16	13	14	69	6
2013-06-10	M	L	70	1.2p	-10	0	-10	lens	-	upper	moderate	28.17	-4.43	-0.23	13.6	0.894427	13	13	15	14	13	69	6
2013-06-10	F	R	65	1	-3.5	-0.75	-3.875	lens	-	-	early	25.42	-2.73	0.98	19.2	3.03315	17	15	21	21	22	24	4
2013-06-10	F	L	52	1.5p	-7.5	-0.5	-7.75	lens	-	-	early	27.81	-1.87	-0.2	14	1	15	13	14	15	13	58	10
2013-06-10	F	R	52	1.5	-6	-0.75	-6.375	lens	-	-	moderate	26.64	-6.51	-0.22	14.2	0.83666	15	13	14	15	14	58	10
2013-06-10	M	R	60	1.5p	-4.25	-1.25	-4.875	lens	-	-	PPG	26.44	-0.62	0.69	16.6	0.894427	16	16	16	18	17
2013-06-10	M	L	60	1.5	-6	-1.25	-6.625	lens	-	-	PPG	26.81	-1.46	-0.6	17.2	1.30384	16	16	17	19	18	70	5
2013-06-10	F	R	29	1.5	-10.25	-0.25	-10.375	lens	+	lower,nasal	ADVANCED	27.48	-6.18	-0.31	18.6	3.36155	16	18	21	23	15	65	18
2013-06-10	F	L	29	1.5	-8.5	-1	-9	lens	-	lower,nasal	moderate	26.89	-6.03	-0.75	16.8	2.58844	14	16	19	20	15	65	18
2013-06-10	F	R	63	1.5p	-4.75	-1	-5.25	lens	-	-	moderate	25.94	-6.31	0.33	18	1.58114	17	18	20	19	16	35	16
2013-06-10	F	L	63	1.2	-5	-1.5	-5.75	lens	-	-	moderate	25.81	-4.34	0.3	17	2.34521	16	16	21	17	15	35	16
2013-06-10	F	R	66	1.5	-3.75	-0.75	-4.125	lens	-	-	ADVANCED	25.82	-4.74	1.39	15.4	3.97492	18	20	16	13	10	33	5
2013-06-10	F	L	66	1.2	-3.75	-0.25	-3.875	lens	-	-	PPG	25.64	-0.47	0.38	15.2	2.77489	16	18	17	14	11	33	5
2013-06-10	M	R	51	1.2	-11	-1	-11.5	lens	-	-	ADVANCED	28.81	-9.26	0.22	17.2	1.64317	20	16	16	17	17
2013-06-10	M	L	51	1	-11.5	-0.25	-11.625	lens	-	-	ADVANCED	28.72	-10.12	-1.94	15.8	1.78885	17	18	16	14	14
2013-06-10	M	R	67	1.2	2	-2.5	0.75	lens	-	-	advanced	22.01	-8.06	-0.02	17.6	3.28634	17	15	21	21	14	61	20
2013-06-10	M	L	67	1.2	0	-0.25	-0.125	lens	-	-	PPG	21.98	-1.85	-0.12	18	2.82843	17	15	21	21	16	61	20
2013-06-17	M	R	46	1.2	-11	-0.25	-11.125	lens	-	-	ADVANCED	28.99	-15.59	-1.33	12.6	1.81659	13	13	12	15	10	54	21
2013-06-17	F	R	73	0.9	-1.25	-3	-2.75	lens	-	-	ADVANCED	24.38	-5.33	-0.41	16	2	18	14	16	18	14
2013-06-17	F	L	73	1.2p	-0.5	-1.5	-1.25	lens	-	-	moderate	24.21	-4.72	-0.17	17	2	19	18	16	18	14	64	6
2013-06-17	M	L	60	1.2p	-8.75	-0.5	-9	lens	-	-	early	26.64	-4.68	0.24	14.4	1.14018	15	14	13	14	16	63	6
2013-06-17	F	R	55	1.2	-9.25	-1	-9.75	lens	-	t.u.	ADVANCED	25.95	-12	0.3	14.8	1.48324	15	13	14	17	15	30	12
2013-06-17	F	L	55	1	-9	-0.5	-9.25	lens	-	-	ADVANCED	26.1	-17.91	-0.58	15.8	2.16795	13	15	18	18	15	30	15
2013-06-17	M	R	72	1	-4	-1.5	-4.75	lens	+	nasal	ADVANCED	26.79	-12.96	-0.01	13	1.41421	12	14	15	12	12	34	4
2013-06-17	M	L	72	1.2	-3.5	-1.5	-4.25	lens	-	-	PPG	26.72	-1.43	-0.31	12.4	1.14018	12	14	11	13	12	46	5
2013-06-17	M	R	49	1.5	-6.5	-0.5	-6.75	lens	-	-	ADVANCED	27.45	-9.64	-0.45	15	1	15	14	14	16	16	54	6
2013-06-17	M	L	49	1.2	-6	-0.25	-6.125	lens	-	-	ADVANCED	27.08	-11.03	-0.15	15.6	0.894427	15	15	15	17	16	54	6
2013-06-17	F	R	39	1.2	-7	-0.5	-7.25	lens	-	nasal	moderate	26.44	-5.01	-0.59	16.8	1.09545	16	16	18	16	18	24	10
2013-06-17	F	L	39	1.5	-3.5	-0.25	-3.625	lens	-	-	PPG	24.97	-2.61	0.48	16.6	1.51658	15	15	18	17	18	24	10
2013-06-17	M	R	54	1.5	-7.5	-0.5	-7.75	lens	-	-	ADVANCED	27.01	-5.49	-0.14	12.6	2.07364	15	11	14	10	13	61	6
2013-06-17	M	L	54	1.5	-6.5	-0.75	-6.875	lens	-	-	PPG	26.48	-0.25	-0.1	12.4	1.67332	14	12	14	10	12	61	6
2013-06-17	M	R	58	1.5p	-1	-0.75	-1.375	lens	-	n.l.n.u.	early	24.42	-3.17	-0.09	16	1.22474	16	16	17	17	14	62	6
2013-06-17	M	L	58	1.5p	-1	-0.25	-1.125	lens	-	-	moderate	24.13	-8.51	-0.22	15.8	1.64317	14	17	17	17	14	62	6
2013-06-17	M	R	46	1.5	-11	-0.5	-11.25	lens	-	-	ADVANCED	29.47	-14.57	-0.67	14.8	2.16795	12	13	16	16	17
2013-06-17	F	R	61	1.5	1	-2.5	-0.25	lens	-	-	ADVANCED	24.15	-14.65	-0.1	15	1.22474	14	17	14	15	15	51	7
2013-06-17	F	R	61	1.5	-7.25	-0.75	-7.625	lens	-	-	early	26.79	-3.17	0.01	15.6	1.34164	15	17	14	15	17	48	17
2013-06-17	F	L	61	1.5	-7.75	-1	-8.25	lens	-	-	moderate	27.12	-8.03	0.02	14.8	1.30384	15	14	17	14	14	48	17
2013-06-24	M	L	55	1.5	-2	-1.25	-2.625	lens	-	-	moderate	24.47	-3.92	-0.61	13.8	1.92354	12	14	13	13	17	30	11
2013-06-24	M	R	55	1.5	-2.5	-1.5	-3.25	lens	-	-	PPG	24.74	1.36	-0.09	14.8	1.64317	13	16	14	14	17	24	9
2013-06-24	F	R	62	1.2	-5.5	-0.75	-5.875	lens	-	-	ADVANCED	27.27	-7.49	-0.03	15.8	1.30384	15	15	15	16	18	54	7
2013-06-24	F	L	62	1.2	-4.5	-1.25	-5.125	lens	-	-	moderate	26.44	-9	0.16	18.4	0.547723	19	18	18	19	18	54	7
2013-06-24	M	L	61	1.5p	-1.25	-1.75	-2.125	lens	-	-	ADVANCED	24.58	-30.43		19		19
2013-06-24	M	R	61	1.5	-0.25	-0.5	-0.5	lens	-	-	early	24.13	-5.78		11		11
2013-06-24	M	R	62	1	-6.5	-0.5	-6.75	lens	-	-	ADVANCED	25.81	-10.62	0.06	15	1.22474	14	15	17	15	14	69	6
2013-06-24	M	L	62	0.7	-7.25	-0.75	-7.625	lens	-	-	ADVANCED	26.25	-4.88	-0.09	15.4	1.14018	15	16	17	15	14	69	6
2013-06-24	F	L	48	1.2	-6.25	-0.75	-6.625	lens	-	-	early	25.43	-2.14	0.17	17.6	2.30217	19	18	17	14	20	48	16
2013-06-24	F	R	64	1.2	-2.75	-1.25	-3.375	lens	-	-	ADVANCED	25.08	-18.62	-1.49	16.8	0.83666	16	17	16	18	17
2013-06-24	F	L	64	1.2	0.5	-1	0	lens	-	-	early	24.12	-3.02	-0.71	17.4	1.14018	19	17	16	18	17
2013-06-24	F	R	49	1.5	-5.75	-0.5	-6	lens	-	-	moderate	27.1	-6.94	0.4	14	1.22474	13	14	13	16	14	58	10
2013-06-24	F	L	49	1.5	-4.75	-0.75	-5.125	lens	-	lower,nasal	PPG	26.35	-1.84	-0.15	14.6	0.894427	14	15	14	16	14	58	10
2013-06-24	M	L	74	1.2	2	-1.75	1.125	lens	-	-	ADVANCED	24.78	-18.34	-0.71	16.4	0.547723	17	17	16	16	16	67	7
2013-06-24	M	R	74	1.2	2.25	-2.25	1.125	lens	-	-	moderate	24.65	-3.35	-0.06	15.6	0.894427	15	16	17	15	15	67	7
2013-06-24	M	R	41	1.5	-6	-0.25	-6.125	lens	-	-	moderate	26.83	-7.29	0.03	15.6	1.34164	15	17	15	14	17	68	7
2013-06-24	M	L	41	1.5	-5.25	-0.5	-5.5	lens	-	-	PPG	26.71	-1.65	-0.03	14.8	1.92354	15	17	16	14	12	68	7
2013-07-01	F	L	67	0.7	-5.25	-4	-7.25	lens	-	-	ADVANCED	26.45	-7.73	-0.33	13.2	1.30384	15	13	12	14	12	14	3
2013-07-01	F	L	64	0.8	-6.75	-2.5	-8	lens	-	-	moderate	26.55	-5.17	-0.01	14.4	0.894427	15	15	14	13	15	63	5
2013-07-01	F	R	38	1.5	-5.75	-0.75	-6.125	lens	+	upper,lower	early	25.45	-1.52	-0.17	14.8	1.48324	13	15	17	15	14	38	12
2013-07-01	F	L	38	1.5p	-5.25	-1.25	-5.875	lens	-	-	moderate	25.36	-5.68	-0.31	15	1.87083	13	15	18	15	14	40	14
2013-07-01	F	L	67	1.5	1.75	-1	1.25	lens	-	-	ADVANCED	24.23	-12.27	-0.34	14.8	1.78885	14	14	14	14	18	70	15
2013-07-01	F	R	67	1.5	2	-1	1.5	lens	-	-	early	23.99	-1.38	-0.2	13.8	1.48324	14	12	14	13	16	70	19
2013-07-01	F	L	48	1.5p	-6.75	-1.75	-7.625	lens	-	-	early	24.42	-0.91	-0.03	13.4	1.14018	14	15	13	12	13	78	24
2013-07-01	F	R	48	1.5p	-8.25	-1.5	-9	lens	-	-	moderate	25.06	-3.54	-0.16	13	1.22474	12	15	13	12	13	78	28
2013-07-01	F	R	73	1.5p	-0.25	-0.75	-0.625	lens	+	upper	ADVANCED	23.15	-4.18	-0.11	16	0.707107	16	17	16	16	15	61	7
2013-07-01	F	L	73	1.5	0.5	-1	0	lens	-	-	ADVANCED	23.07	-5.04	-0.17	15.6	0.894427	17	16	15	15	15	72	8
2013-07-01	F	R	35	1.5	-3.5	-0.75	-3.875	lens	-	lower	ADVANCED	24.99	-3.38	-0.08	15.2	1.64317	14	18	15	14	15	24	14
2013-07-01	F	L	35	1.5	-5	-1.75	-5.875	lens	-	-	PPG	25.56	-1.2	-0.06	16.2	1.48324	16	18	17	14	16	24	14
2013-07-01	M	R	43	1	-3.25	-2.5	-4.5	lens	-	lower NFLD	ADVANCED	25.2	-15.74	0	14	2	12	13	15	13	17	46	18
2013-07-01	M	L	43	1.2	-4.75	-0.25	-4.875	lens	-	-	ADVANCED	26.16	-12.44	-0.19	12.6	1.34164	12	12	15	12	12	46	18
2013-07-01	F	R	77	1.2	-4	-2	-5	lens	-	-	ADVANCED	24.88	-11.99	-0.81	18.2	1.48324	20	18	19	16	18	56	4
2013-07-01	F	L	77	1.2	-1.75	-1.5	-2.5	lens	-	-	early	24.25	-2.05	-0.19	20.4	1.51658	21	20	21	18	22	63	7
2013-07-01	M	R	56	1.5(2013.8月)	-4.75	-0.5	-5	lens	-	lower,temporal	ADVANCED	25.71	-19.52		18.2	3.63318	22	17	16	14	22
2013-07-01	M	L	66	1.2	-6.25	-0.5	-6.5	lens	-	-	early	27.33	-4.09	-0.85	13.6	1.81659	13	16	15	12	12
2013-07-01	M	R	66	1.2	-6.75	-1.25	-7.375	lens	-	-	moderate	27.96	-4.43	-0.24	13.6	2.07364	11	16	15	12	14
2013-07-01	F	R	47	1.5	-1.5	0	-1.5	lens	-	-	ADVANCED	23.48	-1.7	0.14	13.8	0.83666	13	15	14	14	13	26	4
2013-07-01	F	L	47	1.5	-1.25	-0.25	-1.375	lens	-	-	PPG	23.51	-0.68	0.67	15	1.58114	14	17	15	16	13	26	4
2013-07-01	M	R	39	1.5	-5.75	-0.75	-6.125	lens	-	-	ADVANCED	27.25	-7.83	-0.06	19	2.73861	17	16	19	20	23	55	16
2013-07-01	M	L	39	1.2	-4.5	-1.25	-5.125	lens	-	-	early	27.01	-1.44	0.01	18	1.22474	18	16	19	18	19	55	16
2013-07-01	F	R	54	1.5	-5.25	-1	-5.75	lens	-	-	early	27.04	-1.81	-0.13	17.4	1.67332	16	16	17	18	20	51	18
2013-07-08	F	R	66	1.5p	-0.25	-0.75	-0.625	lens	-	-	early		-3.31	-0.02	17.4	1.51658	19	16	19	17	16	60	4
2013-07-08	F	L	66	1.5	-0.75	-0.75	-1.125	lens	-	-	PPG		-1.63	-0.2	17.6	1.81659	19	16	20	17	16	74	4
2013-07-08	M	L	53	1.5	-8.25	-1.25	-8.875	lens	-	-	ADVANCED	28.67	-16.72	-0.01	13.8	1.78885	11	13	15	15	15	55	6
2013-07-08	M	R	53	1.5	-8.75	-0.5	-9	lens	-	-	early	28.77	-3.95	-0.19	14	1.58114	12	15	13	14	16	55	6
2013-07-08	Ｆ	R	38	1.5	-9.75	0	-9.75	lens	-	-	early	27.65	-1.8	0.29	11.6	0.547723	12	12	11	11	12	53	10
2013-07-08	Ｆ	L	38	1.2	-9.5	-0.25	-9.625	lens	-	upper,lower	moderate	27.52	-8.32	-0.11	12	1	11	12	11	13	13	59	11
2013-07-08	M	R	61	1.5	-0.25	-0.5	-0.5	lens	-	upper,nasal,lower	ADVANCED	24.75	-4.79	-0.04	18.6	2.07364	19	20	21	17	16	39	4
2013-07-08	M	L	61	1.5p	-0.25	-0.75	-0.625	lens	-	-	ADVANCED	24.69	-15.61	-0.46	19.4	1.81659	21	20	21	18	17	39	4
2013-07-08	M	R	67	1.5	0.75	-0.756	0.372	lens	-	lower	early	23.5	-0.23	-0.15	14.6	1.51658	16	16	15	13	13	34	12
2013-07-08	M	L	67	1.5	0.75	-1.5	0	lens	-	-	early	23.35	-1.04	-0.17	14.8	1.64317	16	16	16	13	13	34	12
2013-07-08	Ｆ	L	63	1.5	0.5	-1.25	-0.125	lens	-	-	moderate	23.83	-7.68		15	1.41421	14	16	17	14	14
2013-07-08	Ｆ	L	51	1.2	-5	-0.5	-5.25	lens	-	lower	ADVANCED	24.96	-11.1	1.84	13.8	1.78885	16	12	12	14	15	31	4
2013-07-08	M	R	67	0.91	0.25	-2.25	-0.875	lens	-	-	PPG	25.61	-0.34	-0.03	19	4.52769	17	18	13	24	23	72	21
2013-07-08	M	L	67	1.2	0.5	-2.25	-0.625	lens	-	-	PPG	24.95	-0.8	0.23	16.8	2.58844	16	18	13	20	17	72	20
2013-07-08	Ｆ	R	70	1.2	2	-2.5	0.75	lens	-	-	ADVANCED	22.89	-13.65	-0.52	14.6	1.94936	13	18	14	14	14	54	5
2013-07-08	Ｆ	L	70	1.5	2	-2.25	0.875	lens	-	-	early	23	-2.27	-0.03	13.4	2.30217	11	17	12	14	13	54	5
2013-07-22	Ｆ	R	55	1	-8.75	-1.75	-9.625	lens	-	-	early	25.15	-1.03	0.13	18.8	2.16795	19	19	16	18	22	66	7
2013-07-22	Ｆ	L	55	1	-9.5	-2.25	-10.625	lens	-	-	early	25.11	-2.26	-0.12	18.4	2.50998	19	19	16	16	22	66	6
2013-07-22	M	R	64	1.5	-9	-1.25	-9.625	lens	-	-	advanced	27.67	-3.93	-0.19	14.2	2.58844	13	18	15	11	14	66	5
2013-07-22	M	L	64	1.5	-8.25	-0.25	-8.375	lens	-	-	early	27.49	-0.18	-0.14	15.8	1.78885	16	18	17	14	14	66	5
2013-07-22	Ｆ	R	72	1	2.5	-0.5	2.25	lens	-	-	advanced		-7.29	-0.15	13.8	2.16795	15	11	12	16	15	28	5
2013-07-22	Ｆ	L	72	0.8	2.75	-0.5	2.5	lens	-	lower	early		-2.63	-0.65	14.2	1.64317	15	13	12	16	15	28	5
2013-07-22	Ｆ	L	57	1.5	-5.5	-0.75	-5.875	lens	-	-	early	25.36	-1.98	-0.32	13.4	1.34164	12	15	14	12	14	63	19
2013-07-22	Ｆ	R	57	1.5	-5.5	-0.5	-5.75	lens	-	-	moderate	25.3	-3.58	-0.28	14.4	1.14018	13	14	15	16	14	63	19
2013-07-22	Ｆ	R	76	0.9	-1.25	-3	-2.75	lens	-	-	advanced	23.19	-17.47	-1.12	15.8	2.68328	13	16	16	14	20	68	6
2013-07-22	Ｆ	L	76	0.8	-0.5	-3	-2	lens	-	-	advanced	23.07	-9.92	-0.69	16.4	1.51658	15	15	18	16	18	68	6
2013-07-22	Ｆ	R	63	0.6	-10	-0.75	-10.375	lens	-	-	moderate	26.51	-5.71	-0.01	16.2	1.09545	15	16	18	16	16	58	6
2013-07-22	Ｆ	L	39	1.2p	-8.5	-0.5	-8.75	lens	-	-	moderatae	26.31	-7.32		16.6667	0.57735	16	17	17
2013-07-22	Ｆ	R	39	1.2	-7.5	-0.5	-7.75	lens	-	-	moderate	26.01	-7.84		16.6667	0.57735	16	17	17
2013-07-22	M	R	44	1.2	-6.25	-1.75	-7.125	lens	-	-	advanced	27.84	-10.68	-0.36	15.8	2.58844	20	16	15	13	15	46	6
2013-07-22	M	L	44	1.2	-5.75	-1	-6.25	lens	-	-	advanced	26.99	-9.21	-0.16	14.8	2.58844	19	14	12	14	15	58	6
2013-07-22	Ｆ	L	61	1.2	-5	-0.25	-5.125	lens	-	-	advanced	25.89	-1.85	-0.57	13.6	0.894427	14	12	14	14	14	37	12
2013-07-22	Ｆ	R	61	1.2	-5.75	-0.75	-6.125	lens	-	-	early	26.47	-0.89	0.14	15.2	1.64317	16	14	17	13	16	37	12
2013-07-29	Ｆ	R	70	1.2p	0	-0.5	-0.25	lens	-	-	moderate	23.63	-3.62	0.23	15	0.707107	15	16	15	15	14	34	4
2013-07-29	Ｆ	L	70	1.2p	0.75	-0.75	0.375	lens	-	t.u.	PPG	23.58	-0.88	-0.49	14.2	1.48324	12	15	14	16	14	34	4
2013-07-29	M	R	44	1.5	-8	-1.25	-8.625	lens	-	-	advanced	28.49	-23.49	-0.01	15.2	2.77489	11	14	18	17	16	69	14
2013-07-29	M	L	44	1.5	-6	-1	-6.5	lens	-	-	advanced	27.74	-18.55	0.07	14.6	2.79285	10	14	17	16	16	69	14
2013-07-29	M	L	64	1.5	-4.5	-1	-5	IOL	+	lower	advanced	29.78	-3.19	-0.04	16	1.73205	14	17	17			61	4
2013-07-29	M	R	77	1	-1.5	-1.25	-2.125	lens	-	-	ADVANCED	26.49	-28.23		16.6667	1.52753	17	15	18
2013-07-29	M	L	77	1.2p	-2	-0.75	-2.375	lens	-	-	ADVANCED	26.19	-16.08		16.6667	1.52753	17	15	18
2013-07-29	Ｆ	R	48	1.2p	-6.5	-2.25	-7.625	lens	-	-	PPG	27.67	-2.47	0.78	12.6	1.81659	13	13	10	15	12	17	5
2013-07-29	Ｆ	L	48	1.2	-6	-1.25	-6.625	lens	-	-	PPG	27.12	-2.47	-0.17	12.4	1.81659	13	12	10	15	12	17	5
2013-07-29	M	R	34	1.5	-7.5	-1.5	-8.25	lens	+	lower	advanced	27.44	-10.81	-0.42	13.8	2.16795	16	15	11	15	12	66	5
2013-07-29	M	R	41	1.2	-7	-1.5	-7.75	lens	-	nasal ,lower	moderate	26.72	-5.3	-0.08	15.6	0.894427	15	15	16	17	15	53	11
2013-07-29	M	L	41	1.2	-6.75	-2	-7.75	lens	-	nasal	PPG	27.17	-0.52	0.09	15.6	0.547723	15	15	16	16	16	53	11
2013-07-29	M	R	71	0.8	-5.25	-1.75	-6.125	lens	-	-	early	26.35	-0.73	-0.11	20	2.34521	18	20	19	24	19	67	5
2013-07-29	M	L	71	1.2	-5.25	-0.5	-5.5	lens	-	-	moderate	26.04	-7.17	-0.43	18.8	1.92354	19	22	18	17	18	67	5

## Sheet: microcyst 
					total retina		RNFL		GCL+IPL		GCC		INL		outer retina
data of Spectralis exam	sex M/F	side L/R	age	INL cystic change location	microcyst+	microcyst-	microcyst+	microcyst-	microcyst+	microcyst-	microcyst+	microcyst-	microcyst+	microcyst-	microcyst+	microcyst-	autosegmentation	IR hypo	NFLD	NFLD at microcyst	PVD	stage	microcyst timecourse	number of Spectralis exam	follow up(M)	follow up before cyst(M)	HFA follow up period(M)	HFA exam numbers	axial length	MD	MD slope	Spherical	Cylinder	spherical equivalent	IOP average	IOP SD
2013-04-08	F	L	51	T,L	301	328	33	41	64	99	96	140	51	27	154	161	almost OK	lower	＋	＋	incomplete	ADVANCED	stable	19	59	33	66	21	26.21	-12.67	-1.45	-8.75	-0.75	-9.125	16.2	2.38747
2013-04-22	M	R	60	L	302	341	17	54	56	81	74	135	65	39	163	167	almost OK	lower	＋	＋	incomplete	ADVANCED	stable	2	18	18	24	4	25.63	-6.71	-0.33	-6.25	-0.75	-6.625	16.2	1.92354
2013-04-22	F	R	51	TL	313	324	19	23	55	92	74	115	61	39	178	170	almost OK	temporal lower	＋	＋	incomplete	moderate	stable	18	57	51	62	18	25.21	-5.68	-0.79	-4	-0.5	-4.25	14.2	1.64317
2013-05-27	F	R	79	NL,L	302	337	0	31	59	97	59	127	69	47	174	163	almost OK	-	＋	＋	incomplete	ADVANCED	stable	3	21	0	67	5	22.8	-9.22	0.15	0.5	-1	0	13.6	2.60768
2013-05-27	F	L	66	L, NL	305	352	16	32	56	108	71	140	64	37	170	175	almost OK	lower	＋	-	incomplete	ADVANCED	decreased?	3	7	5	39	4	22.51	-3.46	-1.32	1.75	-0.5	1.5	14	2.64575
2013-06-10	F	R	29	L,TL	295	325	15	28	51	104	65	132	60	27	170	166	OK	lower,nasal少し	＋	＋	incomplete	ADVANCED	increased	17	56	11	65	18	27.48	-6.18	-0.31	-10.25	-0.25	-10.375	18.6	3.36155
2013-06-10	F	L	44	NL	324	357	13	57	46	89	59	146	90	40	175	171	Error	lower	＋	＋	incomplete	moderate	increased	18	60	0	60	20	23.41	-2.93	-0.38	-0.25	-0.25	-0.375	14.8	1.64317
2013-06-17	M	R	72	NU	348	333	31	21	110	63	141	84	65	56	142	193	almost OK	nasal	＋	-	complete	ADVANCED	stable	4	17	0	34	4	26.79	-12.96	-0.01	-4	-1.5	-4.75	13	1.41421
2013-07-01	F	R	73	L	300	341	16	31	53	96	69	174	59	47	172	120	almost OK	upper	＋	＋	complete	ADVANCED	stable	4	23	0	61	7	23.15	-4.18	-0.11	-0.25	-0.75	-0.625	16	0.707107
2013-07-01	F	R	38	TU	343	315	32	23	100	80	132	104	46	37	165	174	almost OK	upper,lower	-	-	incomplete	early	decreased?	11	37	37	38	12	25.45	-1.52	-0.17	-5.75	-0.75	-6.125	14.8	1.48324
2013-07-29	M	R	34	L,NL,TL	329	354	16	42	50	99	66	142	74	53	189	159	Error	lower	＋	＋	incomplete	ADVANCED			0	0	66	5	27.44	-10.81	-0.42	-7.5	-1.5	-8.25	13.8	2.16795
2013-07-29	M	L	64	L,NL,	314	360	13	28	51	97	64	125	75	55	175	180	almost OK	lower	-	-	complete	ADVANCED			0	0	61	4	29.78	-3.19	-0.04	-4.5	-1	-5	16	1.73205
2013-05-13	F	L	63	U	333	321	28	26	105	90	132	117	30	39	171	165	almost OK	lower,nasal,upper	＋	-	cannot be determined	ADVANCED	decreased?	18	59	53	67	20	26.4	-15.33	-0.46	-5.75	-0.5	-6	13.6	3.20936
																											54.6154	10.9231
																											15.0584	7.331

## Sheet: normal
age	性別	side OD/OS	BCVA	spherical	cylinder	spherical equivalent	axial length	IOP	MD	INL microcyst
65	M	OD	1	-2.5	-0.75	-2.875	25.73	13	-3.1	-
65	M	OS	1		-1.75	-0.875	24.93	13	-1.49	-
25	M	OS	1.2	-10.75	-1	-11.25	28.04	16	-1.2	-
66	M	OD	1.5	-1	-0.5	-1.25	24.8	14	-2.41	-
66	M	OS	1.5	-1	-0.5	-1.25	24.41	14	-1.71	-
39	F	OD	1.2	-9.5	-1	-10	26.86	17	-2.5	-
39	F	OS	1	-9.5	-1	-10	26.84	17	-1.72	-
80	M	OD	1.5	1.25	-1.5	0.5	23.77	14	0.9	-
80	M	OS	1.2	1	-1.25	0.375	23.77	14	0.39	-
69	F	OD	1.2	2.25	-0.5	2	23.33	18	-4.95	-
69	F	OS	1	2.25	-0.5	2	23.38	18	-4.29	-
68	F	OD	1.5	1.75	-0.75	1.375	22.98	14	1.62	-
68	F	OS	1.5	2.25	-0.5	2	22.9	14	1.49	-
39	M	OD	1.2	-4.75	-0.25	-4.875	24.92	19	-2.64	-
39	M	OS	1.5	-5	-0.75	-5.375	24.95	18	-4.24	-
74	M	OD	0.8	2.25	-3.5	0.5	23.06	20	-1.17	-
76	F	OD	1.0p	0.5	-1	0		15	-5.77	-
76	F	OS	0.8	-1.25	-1.5	-2		15	-4.56	-
46	M	OD	1.5	-4.25	-0.75	-4.625	25.43	16	0.19	-
46	M	OS	1.5	-4	-0.5	-4.25	25.27	16	0.39	-
29	M	OD	1.2	-9	-0.75	-9.375	28.13	16	-3.87	-
29	M	OS	1.5	-8.75	-0.75	-9.125	28.09	16	-4.99	-
65	F	OD	1.5	-0.25	-0.5	-0.5	23.13	20	1.74	-
65	F	OS	1.5	-0.25	-0.5	-0.5	23.28	20	2.22	-
85	M	OD	1	2	-1.25	1.375		16	-3.17	-
85	M	OS	0.6	-1.25	-2.75	-2.625		6	-2.13	-
74	F	OS	1.2	1.5	-0.75	1.125		10	-3.35	-
54	M	OD	1.5	-5.5	-1	-6		15	-5.9	-
54	M	OS	1.5	-5.25	-0.75	-5.625		15	-5.84	-
22	F	OD	1.5	-3.5	-0.5	-3.75	25.63	15	-2.28	-
22	F	OS	1.5	-3.25	-1.5	-4	25.63	14	-3.15	-
81	M	OD	1.5	0.75	-1.25	0.125	24.27	13	-0.1	-
71	M	OD	1.2	-4.5	-1.5	-5.25	24.9	14	-3.51	-
71	M	OS	1.2	-5	-0.75	-5.375	25.53	13	-1.02	-
50	M	OD	1.5	-2.75	-1.25	-3.375	25.55	16	-0.49	-
50	M	OS	1.5	-2.75	-0.5	-3	25.45	16	-0.71	-
59	M	OD	1.5	-4.75	-0.25	-4.875	27.23	14	-2.42	-
59	M	OS	1.5	-2.25	-1.5	-3	26.63	14	-1.12	-
67	F	OD	1	2	-1	1.5		13	-0.04	-
67	F	OS	1.2	1.75	-1	1.25		13	-1.59	-
45	F	OD	1.2		-1.5	-0.75		21	-1.06	-
45	F	OS	1.5	0.75	-2.5	-0.5		18	-1.67	-
59	F	OD	1.5	0.5	-0.75	0.125		20	1.68	-
59	F	OS	1.5	0.5	-1	0		20	1.25	-
64	M	OD	1.5	1	-1.75	0.125	23.74	21	0.86	-
43	F	OD	1.5	-1.5	-0.5	-1.75	25.78	19	-0.19	-
43	F	OS	1.5	-1.75	-0.5	-2	25.82	20	-0.1	-
65	F	OD	1.5	-3.75	-0.75	-4.125	27.87	16	-6.98	-
65	F	OS	1.2	-3.75	-1.25	-4.375	27.9	14	-8.13	-
38	M	OD	0.6	-0.75	-2	-1.75		14	-3.34	-
38	M	OS	1.5	-6.5	-0.5	-6.75		14	-0.63	-
61	M	OD	1.2	-1	-0.75	-1.375		17	-2.47	-
61	M	OS	1.2	0.5	-1	0		15	-2.18	-
56	M	OD	1.2	-1.25	-1	-1.75		20	-3.31	-
56	M	OS	1.2	-1.5	-0.75	-1.875		19	-3.67	-
67	F	OD	1.5	-1	-0.75	-1.375	23.32	20	-0.73	-
47	F	OD	1.2	-8	-0.75	-8.375	26.11	20	-0.53	-
47	F	OS	1.2	-8	-1	-8.5	26.01	21	-0.92	-
72	F	OD	1.5		-0.75	-0.375	23.5	13	-1.05	-
72	F	OS	1.5	1	-2	0	23.47	14	-1.95	-
59	F	OD	1.5	1.25	-0.5	1	22.22	12	-2.68	-
59	F	OS	1.5	1	-0.5	0.75	22.32	12	-2.58	-
48	F	OD	1.2	-6.5	-1.25	-7.125	27.67	10	-4.16	-
48	F	OS	1	-6.25	-1.25	-6.875	27.12	11	-2.25	-
59	F	OD	1	-11	-1	-11.5	27.18	15	-5.17	-
59	F	OS	1.2p	-10.5	-0.75	-10.875	26.94	13	-4.92	-
64	M	OD	1.5	-0.5	-0.5	-0.75		12	-0.33	-
64	M	OS	1.5	-0.25	-0.75	-0.625		12	-1.39	-
42	F	OD	1.5	-9.25	-0.25	-9.375	29.18	14	-1.76	-
42	F	OS	1.5	-8.5	-0.5	-8.75	29.02	16	-2.58	-
66	F	OD	1.5	-1.5	-1.75	-2.375		16	1.58	-
66	F	OS	1.2	-0.5	-2	-1.5		16	0.76	-
44	F	OD	1.5	-7.25	-0.5	-7.5		14	0.34	-
44	F	OS	1.2	-7.25	-1.5	-8		14	-0.64	-
68	M	OD	1.2	-3.5	-1.5	-4.25		13	-5.5	-
68	M	OS	1.2	-3	-0.75	-3.375		11	-0.53	-
48	F	OD	1.2	-4.25	-0.75	-4.625	25.4	19	0.57	-
48	F	OS	1.5	-4.25	-0.75	-4.625	25.12	16	-0.49	-
57	M	OD	1.5		-0.25	-0.125		13	-2.86	-
57	M	OS	1.5		-0.5	-0.25		13	-2.39	-
66	M	OD	1.2	-0.5	-0.5	-0.75	23.53	11	0.1	-
66	M	OS	1.2	-1.25	-0.5	-1.5	23.8	11	0.02	-
70	M	OD	1.5	-0.25	-1.25	-0.875		14	-0.83	-
70	M	OS	1	-1.5	-1.5	-2.25		15	-1.15	-
76	M	OD	1.2	0.75	-0.75	0.375		10	-4.04	-
56	F	OD	1.2	-7.75	-1.25	-8.375		13	-0.5	-
56	F	OS	1.2	-8.25	-0.5	-8.5		12	-1.83	-
49	F	OD	1.5	-4.75	-4	-6.75	25.1	14	0.89	-
49	F	OS	1.5	-3.5	-4.5	-5.75	24.9	15	-1.36	-
43	F	OD	1.2	-5.25	-2	-6.25		18	0.41	-
43	F	OS	1.5	-7.5	-1	-8		16	-0.21	-
44	F	OD	1.5	-0.5	-1.5	-1.25		12	0.38	-
44	F	OS	1.5	0	-1	-0.5		12	-0.16	-
50	F	OD	1.5	-0.5		-0.5		17	-5.05	-
50	F	OS	1.5p	-0.5	-1	-1		19	-5.05	-
42	F	OD	1.5	-0.5	-0.5	-0.75		13	-2.28	-
42	F	OS	1.5	-0.25	0	-0.25		13	-2.15	-
58	M	OD	1.2	-1.5	-1.25	-2.125		15	-3.33	-
58	M	OS	0.9	-2	-1.25	-2.625		17	-5.49	-
44	F	OD	1.5	-4.75	-0.5	-5	25.64	10	-0.46	-
44	F	OS	1.5	-4	-0.5	-4.25	25.59	12	-1.41	-
52	M	OD	1.2	-8	-1	-8.5		16	0.48	-
52	M	OS	1	-9	-0.5	-9.25		16	-1.27	-
48	F	OD	1.5	-0.25	-1.5	-1	24.37	16	-1.29	-
48	F	OS	1.5	0.25	-2.5	-1	24.41	14	-1.31	-
31	M	OD	1.5p	0.75	-1.25	0.125	23.58	12	-2.22	-
59	F	OD	1.5	-0.25		-0.25	24.88	19	-2.6	-
53	M	OD	1.5	-1.5	-1.5	-2.25		16	-0.07	-
53	M	OS	0.9	-1.5	-0.75	-1.875		15	-5.92	-
53	F	OD	1.5	-5	-1	-5.5		14	-2.09	-
53	F	OS	1.5	-5.5	-1.25	-6.125		18	-2.35	-
65	F	OS	1.5	1.5	-0.5	1.25	23.09	10		-
80	F	OD	0.7	1.5	-2.75	0.125	21.27	14	-3.75	-
80	F	OS	1.5	0.5	-0.5	0.25	21.29	14	-0.93	-
22	F	OD	1.5	-3.5	-0.5	-3.75	25.01	18		-
22	F	OS	1.5	-2.75	-0.5	-3	24.63	18		-
59	M	OD	1.5	2.5	-0.5	2.25	23.39	18		-
70	M	OD	1.2	0.5	-0.5	0.25	23.15	14		-
70	M	OS	1.2	0	-0.25	-0.125	23.26	14		-
57	F	OS	1.5	1	-0.5	0.75	22.32	12	-2.58	-
44	M	OS	1.2	-8.75	-1.25	-9.375	26.87	12		-
51	M	OD	1.5	-1.5	-0.75	-1.875	25.9	15	1.23	-
65	M	OD	0.9	-1.25	-1.25	-1.875	25.69	20	-0.1	-
65	M	OS	1.2	-1.25	-0.75	-1.625	25.08	16	1.46	-
74	F	OS	0.8	2	-0.25	1.875	23.06	19	-2.72	-
82	M	OS	1.5	1.5	-0.75	1.125	22.76	14	-1.19	-
67	F	OD	1.5	2	-0.5	1.75	22.98	15	0	-
58	F	OD	1.5	-0.25	-0.25	-0.375	24.88	19	1.55	-
72	M	OD	1.5	0.75	-2.5	-0.5	24.78	14	-1.38	-
76	M	OD	1.2	3	-0.75	2.625	24.98	16	0.09	-
62	F	OD	1	1.5	-1	1		16	0.74	-
63	F	OD	1.5	-0.5	-0.75	-0.875	23.73	16	-1.49	-
57	M	OD	1.5	-5.75	0	-5.75	27.23	14	-2.13	-
57	M	OS	1.5	-3.25	-1.25	-3.875	26.63	14	-1.32	-
53	M	OS	1.5p	-4.75	-1	-5.25	25.49	20	-0.02	-
33	F	OD	1.5	-1	-0.5	-1.25	21.72	14	0.13	-
33	F	OS	1.2	0	-1.25	-0.625	21.78	13	-1.19	-
61	M	OD	1.5	-3	-2.75	-4.375		14	1.04	-
65	M	OD	1.5p	1	-0.5	0.75		14	-0.53	-
63	F	OD	1.2	-4.75	-0.5	-5	24.97	15	1.27	-
76	F	OS	1.0p	-0.5	-2	-1.5		13	-0.85	-
81	M	OD	1.5	-0.25	-2.25	-1.375		14	-1.37	-
46	F	OD	1.5	-1.25	-0.25	-1.375		12	-0.24	-
46	F	OS	1.5	-1	-0.5	-1.25		12	0.49	-
51	M	OD	1.5	0	-1	-0.5	24.54	13	0.32	-
64	F	OS	1	1.25	-0.25	1.125	23.09	11	-0.54	-
63	M	OS	1.2	1.5	-0.5	1.25	23.83	21	-1.52	-
65	M	OS	1.5	0.5	-1	0		16	-0.46	-
23	M	OD	1.5	-1.75	-0.75	-2.125	25.52	16	-1.39	-
23	M	OS	1.5	-1.75	-0.75	-2.125	25.37	16	-1.67	-
68	M	OS	1.5	2	-0.75	1.625	22.23	15	0.17	-
73	M	OD	1.5	0.75	-0.25	0.625	23.89	13	0.3	-
73	M	OS	1.5	1	-0.5	0.75	23.75	13	0.17	-
68	M	OS	1.5	2.25	-1.5	1.5	23.21	14	-0.56	-
61	F	OS	1.2	-2.75	-1	-3.25		12	-1.02	-
55	M	OS	1.5p	-0.5	-1	-1	22.25	21	-1.44	-
39	F	OD	1.5	0	-0.75	-0.375	22.98	19	-4	-
66	M	OD	1.5	1.5	-2	0.5	24.7	16	-0.5	-
78	M	OD	1	-5.25	-0.75	-5.625	25.91	10	-1.38	-
65	F	OD	1.5	-1.25	-2	-2.25		16	1.58	-
65	F	OS	1.2	-0.5	-2.25	-1.625		16	0.76	-
64	M	OS	1	-1.75	-0.75	-2.125	24.93	18	-2.65	-
46	M	OD	1.5	-3.75	-1	-4.25		13	-1.45	-
46	M	OS	1.2	-4.5	-2	-5.5		14	-2.85	-
68	F	OD	1.5	1.75	-0.75	1.375	21.61	19	-1.51	-
85	F	OD	1.2	-2.25	-1.75	-3.125	25.93	16	0.58	-
85	M	OD	1.2p	0.5	-3.5	-1.25		18	-2.41	-
58	F	OD	1.5	0.25	-0.5	0	23.34	19	-1.47	-
58	F	OS	1.5	0.25	-1	-0.25	23.5	19	-1.79	-
60	M	OD	1.5	-1	-0.5	-1.25	24.69	16	-0.36	-
77	F	OD	1	1.75	-1.25	1.125	23.26	18	-0.15	-
70	M	OS	1.2	-1.5	-0.75	-1.875		15	-3.15	-
24	M	OD	1.5	-4.25	-0.75	-4.625	26.59	19	-1.04	-
74	F	OS	1.2	3.75	-1.5	3	23.05	19	-0.25	-
70	F	OD	1.5p	0	-1.75	-0.875	23.16	17	-1.68	-
70	F	OS	1.5p	-1	-1.25	-1.625	23.3	17	-1.38	-
65	M	OS	1.5	0.5	-1.75	-0.375	23.85	16	-2.64	-
78	M	OD	1.2	1.25	-0.75	0.875	23.44	19	1.19	-
65	M	OS	1.2p	-1	-1	-1.5	25.23	16	0.11	-
53	F	OD	1.5	-1.75	-0.25	-1.875		13	1.96	-
53	F	OS	1.5	-1.75	-0.25	-1.875		14	0.55	-
